# 1 Digestive parameters during gestation of Holstein heifers

## 2 Digestion during pregnancy

3

4 Jéssica Marcela Vieira Pereira<sup>1¶</sup>, Marcos Inácio Marcondes<sup>1¶</sup>, Sebastião de Campos

5 Valadares Filho<sup>1&</sup>, Joel Caton<sup>2¶</sup>, Anna Luiza Lacerda Sguizzato<sup>1&</sup>, Alex Lopes Silva<sup>3&</sup>,

6 Julia Travassos da Silva<sup>1&</sup>, Valber Carlos Lima Moraes<sup>1&</sup>, Lucas Faria Gomes<sup>1&</sup>, Polyana

7 Pizzi Rotta<sup>1¶\*</sup>

8 <sup>1</sup> Department of Animal Science, Universidade Federal de Viçosa, Viçosa, Minas Gerais, Brazil

9 <sup>2</sup> Department of Animal Science, North Dakota State University, Fargo, North Dakota, USA

10 <sup>3</sup> Department of Animal Production, Universidade Federal Rural do Rio de Janeiro, Seropédica, Rio de  
11 Janeiro, Brazil

12

13 \* Corresponding author

14 E-mail: [polyana.rotta@ufv.br](mailto:polyana.rotta@ufv.br) (PPR)

15

16 ¶These authors contributed equally to this work.

17 &These authors also contributed equally to this work.

## 19 **Abstract**

20 Our objective was to estimate nutrient intake, ruminal flow, total apparent and ruminal  
21 digestibility, rates of passage and digestion, ruminal and omasal pH, blood metabolite  
22 concentrations, and body measurements during gestation of Holstein heifers. Eleven  
23 pregnant Holstein heifers, 8 of which fitted with a rumen cannula ( $450 \pm 27.6$  kg of body  
24 weight and  $20 \pm 3.5$  months of initial age) were used. All heifers received the same diet  
25 composed of corn silage, soybean meal, corn meal, minerals and vitamins, with a corn  
26 silage:concentrate ratio of 50:50 (on a dry matter basis), aiming an average daily gain of  
27 approximately 1.0 kg. The sampling periods were established according to the days of  
28 gestation: 145, 200, and 255 with a duration of 10 days per period. Total fecal samples  
29 were collected to estimate dry matter, organic matter, crude protein, and neutral detergent  
30 fiber digestibility. Blood samples were collected to analyze metabolites (non-esterified  
31 fatty acids,  $\beta$ -hydroxybutyrate, urea, and glucose). Data were analyzed as a repeated  
32 measurements scheme, using MIXED procedure, with differences declared when  $P <$   
33 0.05. Dry matter intake expressed in kg/day increased from d-145 to d-200, and remaining  
34 stable until d-255 of gestation. The same results were observed for organic matter and  
35 crude protein intake, increasing 15.0 and 35.8% respectively. In contrast, when dry matter  
36 intake was evaluated as % body weight, we observed a decrease of 16.7% from d-200 to  
37 d-255. Days of gestation did not influence ruminal flow of dry matter, organic matter,  
38 crude protein, and neutral detergent fiber. We observed an increase in the ruminal  
39 digestibility of neutral detergent fiber by 20.5%. The apparent total-tract digestibility of  
40 dry matter, organic matter, and crude protein changed over days of gestation, with an  
41 increase of 11.9, 8.5, and 9.8%, respectively, when comparing d-145 with d-200. The rate  
42 of digestion of neutral detergent fiber increased from 2.0 to 3.5%  $\text{h}^{-1}$ . Glucose levels  
43 decreased, while  $\beta$ -hydroxybutyrate and non-esterified fatty acids increased from d-145

44 to d-255. In conclusion, our results demonstrate a reduction in dry matter intake in %  
45 body weight due to pregnancy. It also shows an increase in total apparent digestibility  
46 through gestation, which imply a greater efficiency of use of nutrients by pregnant  
47 animals. Thus, further research is still needed to consolidate such results and to elucidate  
48 the mechanism about nutrient usage during the final third of gestation in heifers.

49

## 50 **Introduction**

51 According to the Hoffman [1], heifers should have the first parturition with at least  
52 94% of their mature body weight, considering the fetal weight. Thus, their nutritional plan  
53 requires strategies to maintain constant and satisfactory gains until the end of gestation  
54 [2]. According to Mohd [3] the advances in reproduction were superior to the nutritional  
55 advances of heifers, producing precocious animals that may present low milk yield in the  
56 first lactation.

57 Literature lacks information on digestive aspects of ruminal flow, intake, passage and  
58 digestion rates of pregnant replacement heifers. However, several studies addressing  
59 nutrient fluxes of non-pregnant lactating animals are found in the literature [4, 5].  
60 Eventually, mathematical models were developed to increase feed efficiency and to  
61 estimate rates of passage, digestion, and to estimate outflow of rumen digesta [6, 7, 8],  
62 however even these models were not developed or evaluated with pregnant heifers.

63 Data regarding nutrition of dairy cattle during gestation are focused on lactating dairy  
64 cows and are scarce for heifers [2, 9, 10]. It is well known that dry matter intake decreases  
65 during the final third of gestation due to the greater size of the gravid uterus and the  
66 increased estrogen concentration [11, 12]. This decrease in dry matter intake may reach  
67 up to 50% in the last 2 months of gestation in dairy cows [12]. However, it is not known  
68 whether dry matter intake in heifers present a similar decrease since they are still growing;

69 such information would be of great use to improve management practices in pregnant  
70 heifers.

71 The hypothesis of this study was that the digestive parameters of pregnant heifers  
72 would be different from data in the literature for pregnant cows and would also be not  
73 altered during pregnancy. Thus, the objectives of this study were to estimate ruminal flow,  
74 total and partial digestibility of dry matter and diet constituents, intake, passage and  
75 digestion rates, ruminal and omasal pH, blood metabolite concentrations, and body  
76 measurements during gestation in Holstein heifers.

77

## 78 **Materials and methods**

### 79 **Animals and management**

80 All procedures were previously approved by the Animal Ethics and Welfare  
81 Committee of the Federal University of Viçosa according to protocol number 020-2016.

82 Eleven pregnant Holstein heifers, 8 of them fitted with a rumen cannula, with a mean  
83 body weight of  $450 \pm 27.6$  kg and mean initial age of  $20 \pm 3.5$  months were used in this  
84 experiment. The sampling periods were established according to the days of gestation:  
85 145, 200, and  $255 \pm 4.45$ , with duration of 10 days for each period. The animals were  
86 allocated to individual stalls of 10 m<sup>2</sup>. Prior to the start of the experiment, heifers  
87 underwent a 30-day adaptation period to experimental facilities and conditions. Heifers  
88 received the same diet (Table 1) for an average daily gain of  $0.98 \pm 0.30$  kg/day, according  
89 to NRC (2001).

90 The roughage:concentrate ratio was 50:50 (dry matter basis) and was delivered daily  
91 at 0700 and 1500 h. Animals were allowed 5% of orts on fresh basis. Once a week, corn  
92 silage was sampled and dried in a ventilated oven at 55°C for 72 h to adjust the diet dry  
93 matter content.

94 **Table 1. Ingredients and chemical composition of feed used in the experimental diet.**

| Item                                 | % of DM |
|--------------------------------------|---------|
| <b>Ingredients</b>                   |         |
| Corn silage                          | 50.0    |
| Soybean meal                         | 25.0    |
| Ground corn                          | 21.6    |
| Limestone                            | 1.07    |
| Sodium bicarbonate                   | 0.75    |
| Magnesium oxide                      | 0.25    |
| Salt                                 | 0.50    |
| Vitamins                             | 0.76    |
| Mineral mix <sup>1</sup>             | 0.02    |
| <b>Chemical composition</b>          |         |
| Dry matter                           | 56.3    |
| Organic matter                       | 95.2    |
| Crude protein                        | 17.7    |
| Neutral detergent fiber              | 32.2    |
| Ether extract                        | 2.7     |
| Non fiber carbohydrates              | 42.6    |
| Indigestible neutral detergent fiber | 10.3    |

<sup>1</sup>Mineral mix composition = 0.83 mg/kg of cobalt sulfate, 38.6 mg/kg of copper sulphate, 0.215 g/kg iron sulphate, 2.39 mg/kg of sodium selenite, 0.167 g/kg of zinc sulfate, and 1.71 mg/kg potassium iodate.

95

## 96 **Intake and digestibility trial**

97 Dry matter intake was daily measured by weighing offered and refused feedstuffs. To  
98 estimate nutrients digestibility, total feces were collected from all heifers for 3  
99 consecutive days in first period: 145-148 days of gestation, second period: 200-203 days  
100 of gestation, and third period 255-258 days of gestation. After 24 h of collection, the total  
101 feces were weighed and approximately 250 g was oven-dried (55°C for 72 h). After each  
102 collection period, a proportional sample was composed using samples and data from the  
103 3 days of fecal collection, based on fecal dry matter production of each day. Then, feces  
104 and feed samples were ground using a mill (Willye, model TE-680, TECNAL, Brazil)  
105 with a 1- and 2-mm sieves and stored for further chemical analyses.

106

## 107 **Omasal and ruminal sampling**

108 A continuous infusion of 5 g/day of Co-EDTA (0.7 g cobalt/day) from the 1<sup>st</sup> to the 6<sup>th</sup>  
109 day of collection was performed during each period (first period: 145-150 days of  
110 gestation, second period: 200-205 days of gestation, and third period 255-260 days of  
111 gestation) using 2 peristaltic pumps (model BP-600.4, Colombo, Paraná, Brazil). A total  
112 of 8 samples per animal were collected from the omasum at a 9-h interval for 3 days;  
113 sampling times were 0200, 0500, 0800, 1100, 1400, 1700, 2000, and 2300 h. The  
114 technique, that was developed by Huhtanen [13] and adapted by Leão [14], was used for  
115 sampling of the omasal digesta, where approximately 250 mL of digesta was used for a  
116 bacterial isolate and 500 mL was used for the ruminal flow estimation [15]. The samples  
117 were stored in plastic containers at -20 °C for further analysis.

118 At the end of each experimental period, samples of omasal digesta were thawed at  
119 room temperature and one composite was created per animal, following the  
120 recommendations of Rotta [15]. Thus, 4 L were obtained to estimate the omasal flow,  
121 which was filtered using a 100 µm nylon filter with an open area of 44% (Sefar Nytex  
122 100/44; Sefar, Thal, Switzerland), thereby obtaining two phases: liquid particles and solid  
123 particles. Thus, the double marker system technique was used to estimate the digesta  
124 omasal flow, using cobalt and indigestible neutral detergent fiber as markers. All samples  
125 were stored in plastic containers and kept at -80° C for further lyophilization (LP510;  
126 Liobras, São Paulo, Brazil). After lyophilization, samples were milled at 2- and 1-mm  
127 sieves mills (Willye, model TE-048, TECNAL, Brazil).

128 Ruminal contents were sampled during the same times as omasal sampling, resulting  
129 in nine samples. Samples were manually collected at the liquid-solid interface of the  
130 rumen, filtered through a 100 µm nylon filter (Sefar Nitex; Sefar, Thal, Switzerland;

131 porosity of 50  $\mu\text{m}$ ), and were subjected to pH measurement by using a digital  
132 potentiometer (pH-221, Lutron Electronics, Taiwan).

133 On the 7<sup>th</sup> day of collection of each experimental period, total rumen emptying was  
134 carried out 4 h after feeding to estimate the rate of passage and digestion [16]. After  
135 removal of all ruminal contents, the digesta was weighed and filtered in a double layer of  
136 cheesecloth for separation of solid and liquid fractions, which were then weighed and  
137 sampled. After sampling, the digesta was reconstituted and returned to the rumen of the  
138 respective animals. On the 9<sup>th</sup> day, the entire rumen emptying procedure was repeated  
139 before morning feeding. The collected samples were lyophilized and ground in a knife  
140 mill with 1 mm sieve (Willye, model TE-680, TECNAL, Brazil). Thus, composite  
141 samples of the dried solid and liquid fractions after emptying the rumen were obtained  
142 and were based on the dry weight of each sample.

143

## 144 **Biometric Measurements**

145 At the end of each experimental period (first period: 154 days of gestation, second  
146 period: 209 days of gestation, and third period 264 days of gestation), body weight,  
147 withers height, croup height, body length, and thoracic perimeter were measured while  
148 the animals were kept in a standing position within the chute.

149

## 150 **Blood measurements**

151 Blood samples were collected on the 10<sup>th</sup> day of each period. The samples were  
152 collected via jugular venipuncture by using vacuum tubes with clot activator and gel for  
153 serum separation (BD Vacutainer® SST® II Advance®, São Paulo, Brazil) in order to  
154 quantify urea, nonesterified fatty acids, and  $\beta$ -hidroxibutirate; an extra tube with EDTA  
155 and sodium fluoride (BD Vacutainer® Fluorinated/EDTA, São Paulo, Brazil) was used

156 to quantity plasma concentration of glucose. After the collection, samples were  
157 centrifuged at  $3600 \times g$  for 20 min, and serum and plasma were immediately frozen at -  
158  $20^{\circ}\text{C}$  until further analysis.

159 Bioclin® kits were used to quantity urea (K056) and glucose (K082), nonesterified  
160 fatty acids, and  $\beta$ -hidroxibutirate were analyzed by using Randox® kits (FA115 and  
161 RB1007, Antrim, United Kingdom). All mentioned analyses were conducted using an  
162 automated biochemical analyzer (Mindray, BS200E, Shenzhen, China).

163

## 164 **Laboratory analysis and calculations**

165 Samples of omasal digesta, feces, feed, and ruminal emptying were analyzed for dry  
166 matter, organic matter, and nitrogen ([17]; method 934.01 for dry matter, 930.05 for  
167 organic matter, and 981.10 for nitrogen, respectively). The ether extract analysis was  
168 performed according to AOAC recommendations ([18]; method 945.16). The neutral  
169 detergent fiber was analyzed, without the addition of sodium sulphite, but with the  
170 addition of detergent thermostable alpha amylase ([19]; INCT-CA method F-001/1). Ash  
171 correction was performed in the neutral detergent fiber residues ([19]; method 942.05).  
172 Indigestible neutral detergent fiber was estimated according with Valente [20], in  
173 triplicate for omasal digesta (particle phase), fecal samples, and rumen emptying samples.  
174 Non-fibrous carbohydrates were calculated according to Van Soest [21], with no  
175 correction for urea.

176 The total-tract apparent digestibility was calculated as:

$$177 \text{Digestibility (\%)} = \{(x - y)/x\} \times 100,$$

178 where x (kg/day) and y (kg/day) are the intake and the output in feces of each component,  
179 respectively.



180 Ruminal digestibility coefficients were estimated by measuring the difference between  
181 the rate of nutrient intake and the flow of the nutrients through the rumen. The calculation  
182 of intestinal digestibility was estimated by the concentration of nutrients in omasal digesta  
183 and feces. The flow of the omasal digesta was estimated through the reconstitution of  
184 digesta technique [22] using the double marker system. Cobalt was used as the liquid  
185 phase marker and the indigestible neutral detergent fiber as the particle phase marker. The  
186 reconstitution factor was calculated based on the concentrations of the markers during the  
187 different phases of the digesta [23].

188 The rates of ingestion ( $k_i$ ), passage ( $k_p$ ), and digestion ( $k_d$ ) were calculated using the  
189 pool-and-flux method [16], according to the following models:

$$190 \quad k_i = (\text{intake/rumen pool}) \times 100$$

$$191 \quad k_p = (\text{rumen flow/rumen pool}) \times 100$$

$$192 \quad k_d = k_i - k_p$$

193 Where,  $k_i$  = ingestion rate of feed fractions (%/h); intake = feed intake (kg/h); rumen pool  
194 = amount of total rumen dry matter (kg);  $k_p$  = passage rate of feed fractions (%/h); rumen  
195 flow = amount of dry matter or nutrients in the omasum (kg/h);  $k_d$  = digestion rate of diet  
196 fractions (%/h).

197

## 198 **Statistical analysis**

199 Data were analyzed as a repeated measurements scheme using the SAS MIXED  
200 procedure (SAS Institute Inc., version 9.4) according to the statistical model:

$$201 \quad Y_{ijk} = \mu + DG_i + \delta_{ij} + \epsilon_{ijk},$$

202 where  $Y_{ijk}$  = dependent variable,  $\mu$  is the overall mean,  $DG_i$  = fixed effect of days of  
203 gestation,  $\delta_{ij}$  the random error with mean of 0 and a variance  $\sigma^2 \delta$ , the variance between  
204 the days of gestation is equal covariance between repeated measures within animals and

205  $\epsilon_{ijk}$  is the model error with a mean of 0 and a variance of  $\tau^2$ . Days of gestation was  
206 considered as repeated measures, and data from ruminal and omasal pH measurements  
207 were also included in the statistical model as time-repeated measures (split-plot of DG).  
208 The fixed time effects and the interaction between time and days of gestation were tested  
209 by using the appropriate covariance structure. The following covariance matrices were  
210 tested: components of variance, composite symmetry, heterogeneous composite  
211 symmetry, and first order heterogeneous auto-regression. The selection of the covariance  
212 matrix was based on the Akaike-corrected criterion, and the composite symmetry matrix  
213 was chosen. Results are presented as least squared means and their standard error of the  
214 mean. Differences were declared when  $P < 0.05$ .

215

## 216 **Results**

### 217 **Intake, ruminal flow and digestibility**

218 The dry matter intake (kg/day) increased ( $P = 0.03$ ) at d-200 and d-255 compared to  
219 d-145 (Table 2). As for nutrient intake, the same pattern was observed, with an increase  
220 of 14.7% ( $P < 0.01$ ) for organic matter, 41.7% ( $P < 0.01$ ) for crude protein, at 145 and  
221 200 days of gestation, and for neutral detergent fiber there was no difference. Regarding  
222 to dry matter intake in % body weight (Fig 1), there was no difference ( $P > 0.05$ ) between  
223 145 to 200 days of gestation, but there was a 16.7% ( $P < 0.01$ ) reduction from 200 to 255  
224 days of gestation.

225 Ruminal flows of dry matter, organic matter, crude protein, and neutral detergent fiber  
226 were not affected by days of gestation (Table 2). The same pattern was observed for  
227 ruminal digestibility of dry matter and organic matter, but neutral detergent fiber  
228 increased by 46.6% from 145 to 255 days of gestation ( $P = 0.03$ ). The apparent total-tract

229 digestibility of dry matter, organic matter, and crude protein was altered ( $P < 0.01$ ) by  
 230 days of gestation, with an increase of 11.9, 8.5, and 9.8%, respectively, when comparing  
 231 the 145 and 200 days of gestation. There was no difference (Table 2) for neutral detergent  
 232 fiber digestibility among days of gestation.

233

234 **Table 2. Intake (n = 11), ruminal outflow (n = 8), ruminal (n = 8) and apparent total-**  
 235 **tract digestibility (n = 11) of Holstein heifers in different days of gestation.**

| Item                                  | Day of gestation         |                           |                          | P-value |
|---------------------------------------|--------------------------|---------------------------|--------------------------|---------|
|                                       | 145                      | 200                       | 255                      |         |
| Intake, kg/day                        |                          |                           |                          |         |
| Dry matter                            | 8.4 ± 0.48 <sup>b</sup>  | 9.7 ± 0.48 <sup>a</sup>   | 9.0 ± 0.51 <sup>ab</sup> | 0.03    |
| Organic matter                        | 7.5 ± 0.36 <sup>b</sup>  | 8.6 ± 0.36 <sup>a</sup>   | 8.4 ± 0.38 <sup>a</sup>  | < 0.01  |
| Crude protein                         | 1.2 ± 0.76 <sup>b</sup>  | 1.7 ± 0.76 <sup>a</sup>   | 1.6 ± 0.08 <sup>a</sup>  | < 0.01  |
| Neutral detergent fiber               | 2.8 ± 0.12               | 2.7 ± 0.12                | 2.7 ± 0.13               | 0.64    |
| Ruminal outflow, kg/day               |                          |                           |                          |         |
| Dry matter                            | 5.2 ± 0.28               | 5.5 ± 0.28                | 5.2 ± 0.31               | 0.54    |
| Organic matter                        | 4.3 ± 0.24               | 4.5 ± 0.24                | 4.3 ± 0.26               | 0.57    |
| Crude protein                         | 1.0 ± 0.07               | 1.1 ± 0.07                | 1.1 ± 0.08               | 0.57    |
| Neutral detergent fiber               | 1.2 ± 0.14               | 1.4 ± 0.14                | 1.7 ± 0.16               | 0.08    |
| Ruminal digestibility, %              |                          |                           |                          |         |
| Dry matter                            | 54.3 ± 2.64              | 55.7 ± 2.64               | 55.7 ± 3.15              | 0.75    |
| Organic matter                        | 58.6 ± 2.37              | 58.8 ± 2.37               | 59.8 ± 2.63              | 0.89    |
| Neutral detergent fiber               | 42.4 ± 4.22 <sup>b</sup> | 51.1 ± 4.22 <sup>ab</sup> | 62.1 ± 4.88 <sup>a</sup> | 0.03    |
| Apparent total-tract digestibility, % |                          |                           |                          |         |
| Dry matter                            | 72.1 ± 1.35 <sup>a</sup> | 79.6 ± 1.35 <sup>b</sup>  | 79.9 ± 1.49 <sup>b</sup> | < 0.01  |
| Organic matter                        | 75.0 ± 1.29 <sup>a</sup> | 81.4 ± 1.29 <sup>b</sup>  | 82.5 ± 1.43 <sup>b</sup> | < 0.01  |
| Crude protein                         | 75.2 ± 1.21 <sup>a</sup> | 82.7 ± 1.21 <sup>b</sup>  | 82.7 ± 1.33 <sup>b</sup> | < 0.01  |
| Neutral detergent fiber               | 67.0 ± 2.35              | 70.4 ± 2.35               | 73.9 ± 2.59              | 0.15    |

236 <sup>a-b</sup>Means within a row with different superscripts differ ( $P < 0.05$ ).

237

238 **Fig 1. Dry matter intake (% BW) in different days of gestation of Holstein heifers**  
 239 **(number of animals = 11).** \* Indicative of significance in the days of gestation ( $P < 0.05$ )

240

241 **Digestion kinetics**

242 Rumen pools and kinetics data are shown in Table 4. The values for dry matter  $k_i$ ,  $k_p$ ,  
 243 and  $k_d$  did not differ among days of gestation. The means of dry matter  $k_i$ ,  $k_p$ , and  $k_d$  were  
 244 8.0, 4.7, and 3.3 % h<sup>-1</sup>, respectively. The values for neutral detergent fiber  $k_i$  and  $k_p$  did  
 245 not differ among days of gestation, and the means were 4.3 and 2.0 % h<sup>-1</sup>, respectively.  
 246 The  $k_d$  of neutral detergent fiber increased from 2.0 to 3.5 % h<sup>-1</sup> ( $P = 0.01$ ).

247

248 **Table 4. Digestion kinetics for Holstein heifers in different days of gestation (n = 8).**

| Item                     | Days of gestation  |                         |                          | <i>P</i> -value         |      |
|--------------------------|--------------------|-------------------------|--------------------------|-------------------------|------|
|                          | 145                | 200                     | 255                      |                         |      |
| Rates, % h <sup>-1</sup> |                    |                         |                          |                         |      |
| Dry matter               | $k_i$ <sup>1</sup> | 7.3 ± 0.65              | 8.4 ± 0.65               | 8.3 ± 0.72              | 0.25 |
|                          | $k_p$ <sup>2</sup> | 4.5 ± 0.43              | 4.8 ± 0.43               | 4.9 ± 0.47              | 0.57 |
|                          | $k_d$ <sup>3</sup> | 2.8 ± 0.36              | 3.6 ± 0.36               | 3.4 ± 0.41              | 0.24 |
| Neutral detergente fiber | $k_i$              | 4.8 ± 0.37              | 4.5 ± 0.37               | 5.0 ± 0.41              | 0.20 |
|                          | $k_p$              | 2.2 ± 0.36              | 2.3 ± 0.36               | 1.6 ± 0.42              | 0.22 |
|                          | $k_d$              | 2.0 ± 0.26 <sup>b</sup> | 2.6 ± 0.26 <sup>ab</sup> | 3.5 ± 0.30 <sup>a</sup> | 0.01 |
| Rumen pool sizes, kg     |                    |                         |                          |                         |      |
| Dry matter               |                    | 4.9 ± 0.28              | 5.0 ± 0.28               | 4.6 ± 0.30              | 0.36 |
| Neutral detergente fiber |                    | 2.5 ± 0.16              | 2.2 ± 0.16               | 2.2 ± 0.18              | 0.14 |

249 <sup>1</sup> $k_i$  = rate of ingestion of feed fractions.

250 <sup>2</sup> $k_p$  = passage rate of feed fractions.

251 <sup>3</sup> $k_d$  = digestion rate of feed fractions.

252

253 There was no difference ( $P > 0.05$ ) for the ruminal pool of dry matter and neutral  
 254 detergent fiber among days of gestation, thereby presenting with an average ruminal pool  
 255 of 3.9 kg for dry matter and 2.3 kg for neutral detergent fiber.

256

## 257 **Ruminal and omasal pH**

258 There was pH interaction ( $P = 0.01$ ) between collection times and days of gestation  
 259 for ruminal fluid and omasal fluid ( $P < 0.01$ ) (Figs 2 and 3). Values for ruminal pH  
 260 increased ( $P < 0.01$ ) at 0500 h from 145 to 255 days of gestation, the same pattern was

261 observed at 1700, 2000 and 2300 h ( $P < 0.01$ ) with pH values from 5.5 to 6.11, 5.6 to 5.9  
 262 and 5.6 to 6.2, respectively. The omasal pH interaction effect was present at 0500, 0800,  
 263 1100 and 1400 h. Values of pH at 0500 increased in 10.8 % from 145 to 200 days of  
 264 gestation, and the pH values at 0800, 1100 and 1400 h increased 2.6%, 6.1% and 6.0%  
 265 from 145 to 255 days of gestation, respectively.

266

267 **Figure 2. pH of ruminal fluid in different days of gestation of Holstein heifers.**

268 Arrows indicate the time of diet delivered at 0700 and 1500 h (number of animals = 8).

269

270 **Figure 3. pH of omasal fluid in different days of gestation of Holstein heifers.** Arrows

271 indicate the time of diet delivered at 0700 and 1500 h (number of animals = 8).

272

## 273 **Body measurements**

274 The measurements of the teats were not different ( $P > 0.05$ ) among the evaluated  
 275 periods, however, we observed that the anterior teats were 15.1% larger than the posterior  
 276 teats (Table 3). The measurements of body weight, withers height, croup height, body  
 277 length, and thoracic perimeter presented a difference ( $P < 0.01$ ) among periods that were  
 278 evaluated with an increase of 23.7, 4.4, 4.2, 23.1 and 11.1% respectively, when we  
 279 compare 145 and 255 days of gestation (Table 3).

280

281 **Table 3. Biometric measurements in pregnant Holstein heifers (n = 11).**

| Item                  | Days of gestation         |                           |                           | P-value |
|-----------------------|---------------------------|---------------------------|---------------------------|---------|
|                       | 145                       | 200                       | 255                       |         |
| Body weight, kg       | 469.9 ± 20.0 <sup>c</sup> | 539.5 ± 20.0 <sup>b</sup> | 580.9 ± 20.3 <sup>a</sup> | < 0.01  |
| Withers height, m     | 1.35 ± 0.01 <sup>c</sup>  | 1.39 ± 0.01 <sup>b</sup>  | 1.41 ± 0.01 <sup>a</sup>  | < 0.01  |
| Croup height, m       | 1.41 ± 0.02 <sup>c</sup>  | 1.44 ± 0.02 <sup>b</sup>  | 1.47 ± 0.02 <sup>a</sup>  | < 0.01  |
| Body length, m        | 1.21 ± 0.04 <sup>b</sup>  | 1.48 ± 0.04 <sup>a</sup>  | 1.49 ± 0.04 <sup>a</sup>  | < 0.01  |
| Thoracic perimeter, m | 1.89 ± 0.06 <sup>b</sup>  | 2.03 ± 0.06 <sup>a</sup>  | 2.10 ± 0.06 <sup>a</sup>  | < 0.01  |

282 <sup>a-b</sup>Means within a row with different superscripts differ ( $P < 0.05$ ).

283

## 284 **Blood metabolites**

285 Glucose levels decreased ( $P = 0.01$ ) by approximately 6.9% from 145 to 255 days of  
286 gestation and the levels of  $\beta$ -hydroxibutirate increased ( $P < 0.01$ ) in the same period by  
287 62.9% (Table 5). The urea and nonesterified fatty acids concentration did not differ ( $P >$   
288 0.05) among days of gestation.

289

290 **Table 5. Metabolic parameters (mmol/L) of blood samples for Holstein heifers in**  
291 **different days of gestation (n = 11).**

| Item                       | Days of gestation           |                              |                             | P-value |
|----------------------------|-----------------------------|------------------------------|-----------------------------|---------|
|                            | 145                         | 200                          | 255                         |         |
| Glucose                    | 4.0 $\pm$ 0.05 <sup>a</sup> | 3.9 $\pm$ 0.05 <sup>ab</sup> | 3.8 $\pm$ 0.06 <sup>b</sup> | < 0.01  |
| Non-esterified fatty acids | 0.2 $\pm$ 0.04              | 0.2 $\pm$ 0.04               | 0.3 $\pm$ 0.05              | 0.14    |
| Urea                       | 1.7 $\pm$ 0.12              | 1.8 $\pm$ 0.12               | 1.8 $\pm$ 0.14              | 0.49    |
| $\beta$ -hydroxibutyrate   | 0.3 $\pm$ 0.04 <sup>b</sup> | 0.4 $\pm$ 0.04 <sup>a</sup>  | 0.4 $\pm$ 0.04 <sup>a</sup> | < 0.01  |

292 <sup>a-b</sup>Means within a row with different superscripts differ ( $P < 0.05$ ).

293

## 294 **Discussion**

295 There is a lack of information about dry matter intake changes of growing heifers  
296 during the last trimester of gestation [9]. To our knowledge this is the first study aiming  
297 to evaluate digestive parameters in pregnant Holstein heifers. When comparing dry matter  
298 intake (kg/day) at three days of gestation evaluated, we observed an increase of  
299 approximately 15.5% between 145 and 200 days of gestation (1.3 kg/day). This might be  
300 explained by the fact that heifers are still growing (increasing body measurements) and  
301 had an average daily gain around 1.0 kg which is not the case of mature cows, which have

302 a reduction in dry matter intake during pregnancy [12, 24, 25]. Similarly, nutrient intake  
303 also showed the same pattern as dry matter in this study.

304 However, we observed that dry matter intake expressed in % body weight was constant  
305 at 145 and 200 days of gestation and had a 16.7% decrease at 255 days of gestation, which  
306 corresponds to the 37<sup>th</sup> week of gestation, approximately. This reduction was also  
307 reported by Park [26] (25.6%), and Rotta [12] (22.0%) when evaluating dairy cows.  
308 However, the reduction of dry matter intake expressed in % body weight, from dairy cows  
309 reported was numerically greater than our study with pregnancy heifers. The reduction of  
310 dry matter intake might be influenced by increase or decrease in the concentration of  
311 hormones such as estrogen and progesterone, respectively [27], as well as the reduction  
312 of rumen physical space at the end of gestation [12], which, according to Forbes [28], is  
313 the most limiting factor of consumption. This result implies a greater use of feed by the  
314 animal.

315 According to Rotta [12] and Park [26], with advancing gestation the total-tract dry  
316 matter, organic matter, crude protein and neutral detergent fiber digestibility, has shown  
317 a reduction, which in part can be explained by the increase of passage rate [29].  
318 Nevertheless, in the present study, we observed that apparent total-tract dry matter,  
319 organic matter, crude protein and neutral detergent fiber digestibility increased and no  
320 difference was observed for the  $k_p$  in the period of gestation evaluated, which explains  
321 the non-reduction of total-tract digestibility.

322 Studies evaluating digestion kinetics during gestation of cows are scarce. In our study  
323 the rates of gestation, passage and digestion remained constant, with no differences  
324 among the days of gestation, excepted for the neutral detergent fiber  $k_d$ . Comparing  
325 multiparous cows [30,31] observed an increase in the rate of passage during the  
326 pregnancy, with decrease nutrient digestibility [32]. However, the pattern observed for

327 pregnant dairy cows was not observed in this study. Factors such as physiological,  
328 gastrointestinal, and feed changes should be considered to explain response rates in  
329 addition to feed characteristics (particle size) [26] and might have influenced the lack of  
330 difference along the days of gestation when these variables were assessed.

331 Further studies should be performed to better elucidate rumen parameters at late  
332 gestation in Holstein heifers, so they may be used as the basis for formulating rations to  
333 meet the requirements of this category, since the focus in the studies are based on  
334 multiparous lactating cows.

335 Considering the concentration of metabolites in dairy cows, studies using lactating  
336 cows have been carried out and limits of several metabolites have been established [33,  
337 34, 35]. However, according to Briscic [36], reference values for heifers at the end of  
338 gestation have not been studied. In this study, values for glucose and urea were similar to  
339 those found by Briscic [36]: minimum concentration of 2.8 mmol/L and maximum of 4.0  
340 mmol/L for glucose, and for urea the values were between 1.1 mmol/L and 5.8 mmol/L,  
341 thus establishing such values as a reference for heifers during late-gestation.

342 Values of  $\beta$ -hidroxibutirate in the present study reached 0.44 mmol/L, which are 3  
343 times lower than the values utilized as threshold for ketosis [37]. The values found for  
344 nonesterified fatty acids reached 0.34 mmol/L. According to Overton [33], levels above  
345 0.5 mmol/L in the prepartum period indicate a greater probability of developing some  
346 metabolic disease. Thus, the heifers in the present study with an average daily gain  
347 approximately of 1.0 kg are unlikely to present metabolic problems due to the low levels  
348 of  $\beta$ -hidroxibutirate and nonesterified fatty acids.

349



## 350 **Conclusions**

351 Holstein heifers during the last trimester of pregnancy demonstrate an increase in the  
352 intake and apparent total-tract digestibility of dry matter, organic matter, and crude  
353 protein from 200 days of gestation. Also, there was a reduction of dry matter intake  
354 expressed as a percentage of body weight at the end of gestation by 16.7%, reaching  
355 1.49% body weight at 250 days of gestation. The digestion kinetics remained constant.  
356 Studies evaluating such factors are scarce in the literature, so further research is still  
357 needed to consolidate such results.

358

## 359 **Acknowledgments**

360 The authors thank the Instituto Nacional de Ciências e Tecnologia de Ciência Animal  
361 (INCT-CA), Fundação de Amparo à Pesquisa do Estado de Minas Gerais (FAPEMIG),  
362 Coordenação de Aperfeiçoamento de Pessoal de Nível Superior (CAPES) and Conselho  
363 Nacional de Desenvolvimento Científico e Tecnológico (CNPq, Brazil) for financial  
364 support.

365

## 366 **References**

- 367 1. Hofmman PC. Feeding management of the dairy heifer from 4 months to calving.  
368 In: Beede DK, editor. Large Dairy Herd Management. Champaign: American  
369 Dairy Science Association; 2017. p. 431-444.
- 370 2. Heinrichs AJ, Zanton GI, Lascano GJ, Jones CM. A 100-Year Review: A century  
371 of dairy heifer research. J Dairy Sci. 2017; 100:10173–10188.  
372 doi:10.3168/jds.2017-12998.

- 373 3. Mohd N, Steeneveld W, van Werven T, Mourits MCM, Hogeveen H. First-calving  
374 age and first-lactation milk production on Dutch dairy farms. *J. Dairy Sci.* 2013;  
375 96:981–992. doi:10.3168/jds.2012-5741.
- 376 4. Berends H, van den Borne JJGC, Stockhofe-Zurwieden N, Gilbert MS, Zandstra  
377 T, Pellikaan WF, et al. Effects of solid feed level and roughage-to-concentrate ratio  
378 on ruminal drinking and passage kinetics of milk replacer, concentrates, and  
379 roughage in veal calves. *J Dairy Sci.* 2015; 98: 5621–5629. doi:10.3168/jds.2015-  
380 9367.
- 381 5. Ramirez-Ramirez HA, Castillo Lopez E, Jenkins CJR, Aluthge ND, Anderson C,  
382 Fernando SC, et al. Reduced-fat dried distillers grains with solubles reduces the  
383 risk for milk fat depression and supports milk production and ruminal fermentation  
384 in dairy cows. *J Dairy Sci.* 2016; 99: 1912–1928. doi:10.3168/jds.2015-9712.
- 385 6. Allen MS, Linton JAV. in *Vivo Methods To Measure Digestibility and Digestion*  
386 *Kinetics of Feed Fractions in the Rumen.* Simpósio Int Sobre Avanços em Técnicas  
387 *Pesqu Nutr Ruminantes.* 2007; 72–89.
- 388 7. Gregorini P, Beukes P, Waghorn G, Pacheco D, Hanigan M. Development of an  
389 improved representation of rumen digesta outflow in a mechanistic and dynamic  
390 model of a dairy cow, Molly. *Ecol Modell.* 2015; 313:293-306. doi:  
391 10.1016/j.ecolmodel.2015.06.042.
- 392 8. Bannink A, van Lingen HJ, Ellis JL, France J, Dijkstra J. The contribution of  
393 mathematical modeling to understanding dynamic aspects of rumen metabolism.  
394 *Front Microbiol.* 2016; 7:1820. doi:10.3389/fmicb.2016.01820.
- 395 9. NRC. *Nutrient requirements of dairy cattle.* 7th ed. Washington, D.C.: National  
396 Academic Press; 2001.
- 397 10. Akers RM. Mammary development in calves and heifers. In: Beede DK, editor.

- 398 Large Dairy Herd Management. Champaign: American Dairy Science Association;  
399 2017. p. 815-827.
- 400 11. Bertoni G, Trevisi E. Use of the liver activity index and other metabolic variables  
401 in the assessment of metabolic health in dairy herds. *Vet Clin North Am - Food*  
402 *Anim Pract.* 2013; 29: 413–431. doi:10.1016/j.cvfa.2013.04.004
- 403 12. Rotta PP, Filho SCV, Gionbelli TRS, Costa e Silva LF, Engle TE, Marcondes MI,  
404 et al. Effects of day of gestation and feeding regimen in Holstein × Gyr cows: I.  
405 Apparent total-tract digestibility, nitrogen balance, and fat deposition. *J Dairy Sci.*  
406 2015; 98: 3197–3210. doi:10.3168/jds.2014-8280.
- 407 13. Huhtanen P, Brotz PG, Satter LD. Omasal sampling technique for assessing  
408 fermentative digestion in the forestomach of dairy cows. *J. Anim Sci.* 1997;  
409 75:1380–1392. doi:10.2527/1997.7551380x.
- 410 14. Leão MI, De Campos Valadares Filho S, Rennó LN, Gonçalves LC, Cecon PR,  
411 Azevedo JAG, et al. Consumos e digestibilidades totais e parciais de matéria seca,  
412 matéria orgânica, proteína bruta e extrato etéreo em novilhos submetidos a três  
413 níveis de ingestão e duas metodologias de coleta de digestas abomasal e omasal.  
414 *Rev Bras Zootec.* 2004; 33: 1604–1615. doi:10.1590/s1516-35982004000600028.
- 415 15. Rotta PP, Valadares Filho SC, Detmann E, Costa e Silva LF, Paulino MF,  
416 Marcondes MI, et al. Digesta sampling sites and marker methods for estimation of  
417 ruminal outflow in bulls fed different proportions of corn silage or sugarcane. *J*  
418 *Anim Sci.* 2014; 92:2996-3006. doi: 10.2527/jas.2013-7364.
- 419 16. Allen MS, Linton JAV. In vivo methods to measure digestibility and digestion  
420 kinetics of feed fractions in the rumen. *Simpósio Intern Avanços Técnicas Pesqu*  
421 *Nutr Rumin.* 2007; 72–89.
- 422 17. AOAC International. Official Methods of Analysis. 17th ed. AOAC International,

- 423           Arlington, VA; 2000.
- 424   18.   AOAC International. Official Methods of Analysis. 18th ed. AOAC International,  
425           Gaithersburg, MD; 2006.
- 426   19.   Detmann E, Souza MA, Valadares Filho SC, Queiroz AC, Berchielli TT, Saiba  
427           EOS, et al. Methods for feed analysis-INCT-Animal Science. Visconde do Rio  
428           Branco, BR: Suprema Gráfica; 2012.
- 429   20.   Valente TNP, Detmann E, Queiroz AC, Valadares Filho SC, Gomes DI, Figueiras  
430           JF. Evaluation of ruminal degradation profiles of forages using bags made from  
431           different textiles. Rev Bras Zootec. Sociedade Brasileira de Zootecnia; 2011; 40:  
432           2565–2573. <https://doi.org/10.1590/S1516-35982011001100039>.
- 433   21.   Van Soest PJ. Nutritional Ecology of the Ruminant. 2nd ed. Ithaca, NY: Comstock  
434           Publishing Associates; 1994.
- 435   22.   Faichney GJ. The use of markers to partition digestion within the gastrointestinal  
436           tract of ruminants. In: Digestion and metabolism in the ruminant. Proc. IV Int.  
437           Symposium Ruminant and Physiology. Sydney, Australia. 1975; p.277-291.
- 438   23.   France J, Siddons RC. Determination of digesta flow by continuous marker  
439           infusion. J Theor Biol. 1986; 121:105–120. doi: 10.1016/S0022-  
440           5193(86)80031-5.
- 441   24.   Shonka BN, Tao S, Dahl GE, Spurlock DM. Genetic regulation of prepartum dry  
442           matter intake in Holstein cows. J Dairy Sci. 2015; 98: 8195–8200.  
443           doi:10.3168/jds.2015-9675
- 444   25.   Salin S, Vanhatalo A, Elo K, Taponen J, Boston RC, Kokkonen T. Effects of  
445           dietary energy allowance and decline in dry matter intake during the dry period on  
446           responses to glucose and insulin in transition dairy cows. J Dairy Sci. 2017; 100:  
447           5266–5280. doi:10.3168/jds.2016-11871.

- 448 26. Park AF, Shirley JE, Titgemeyer EC, DeFrain JM, Cochran RC, Wickersham EE,  
449 et al. Characterization of ruminal dynamics in Holstein dairy cows during the  
450 periparturient period. *J Anim Physiol Anim Nutr (Berl)*. 2011; 95: 571–582.  
451 doi:10.1111/j.1439-0396.2010.01085.x.
- 452 27. Ingvarsten KL, Andersen JB. Integration of metabolism and intake regulation: A  
453 review focusing on periparturient animals. *J Dairy Sci*. 2000; 83: 1573–1597.  
454 doi:10.3168/jds.S0022-0302(00)75029-6
- 455 28. Forbes JM. The physical relationships of the abdominal organs in the pregnant ewe.  
456 *J Agric Sci*. 1968; 70:171–177. doi: 10.1017/S0021859600011023.
- 457 29. Beharka A, Cochran B, Harmon D, Avery T. The influence of stage of pregnancy  
458 on digestion characteristics of beef cows. *Kansas State Univ. Prog. Rep*. 1988;  
459 539:13–15.
- 460 30. Stanley TA, Cochran RC, Vanzant ES, Harmon DL, Corah LR. Periparturient  
461 changes in intake, ruminal capacity, and digestive characteristics in beef cows  
462 consuming alfalfa hay. *J Anim Sci*. 1993; 71:788–795. doi:  
463 10.2527/1993.713788x.
- 464 31. Reynolds CK, Dürst B, Lupoli B, Humphries DJ, Beaver DE. Visceral tissue mass  
465 and rumen volume in dairy cows during the transition from late gestation to early  
466 lactation. *J Dairy Sci*. 2004;87: 961–971. doi:10.3168/jds.S0022-0302(04)73240-  
467 3.
- 468 32. Tyrrell HF, Moe PW. Effect of intake on digestive efficiency. *J Dairy Sci*. 1975;  
469 58:1151-1163. doi: 10.3168/jds.S0022-0302(75)84694-7.
- 470 33. Overton TR, McArt JAA, Nydam DV. A 100-Year Review: Metabolic health  
471 indicators and management of dairy cattle. *J Dairy Sci*. 2017; 100: 10398–10417.  
472 doi:10.3168/jds.2017-13054.

- 473 34. Ospina PA, Nydam DV, Stokol T, Overton TR. Associations of elevated  
474 nonesterified fatty acids and  $\beta$ -hydroxybutyrate concentrations with early lactation  
475 reproductive performance and milk production in transition dairy cattle in the  
476 northeastern United States. *J Dairy Sci.* 2010; 93: 1596–1603.  
477 doi:10.3168/jds.2009-2852.
- 478 35. Cozzi G, Ravarotto L, Gottardo F, Stefani AL, Contiero B, Moro L, et al. Short  
479 communication: reference values for blood parameters in Holstein dairy cows:  
480 Effects of parity, stage of lactation, and season of production. *J Dairy Sci.* 2011;  
481 94:3895–3901. doi: 10.3168/jds.2010-3687.
- 482 36. Brscic M, Cozzi G, Lora I, Stefani AL, Contiero B, Ravarotto L, et al. Short  
483 communication: Reference limits for blood analytes in Holstein late-pregnant  
484 heifers and dry cows: Effects of parity, days relative to calving, and season. *J Dairy*  
485 *Sci.* 2015;98: 7886–7892. doi:10.3168/jds.2015-9345.
- 486 37. Duffield TF, Lissemore KD, McBride BW, Leslie KE. Impact of hyperketonemia  
487 in early lactation dairy cows on health and production. *J Dairy Sci.* 2009; 92:571–  
488 580. doi: 10.3168/jds.2008-1507.

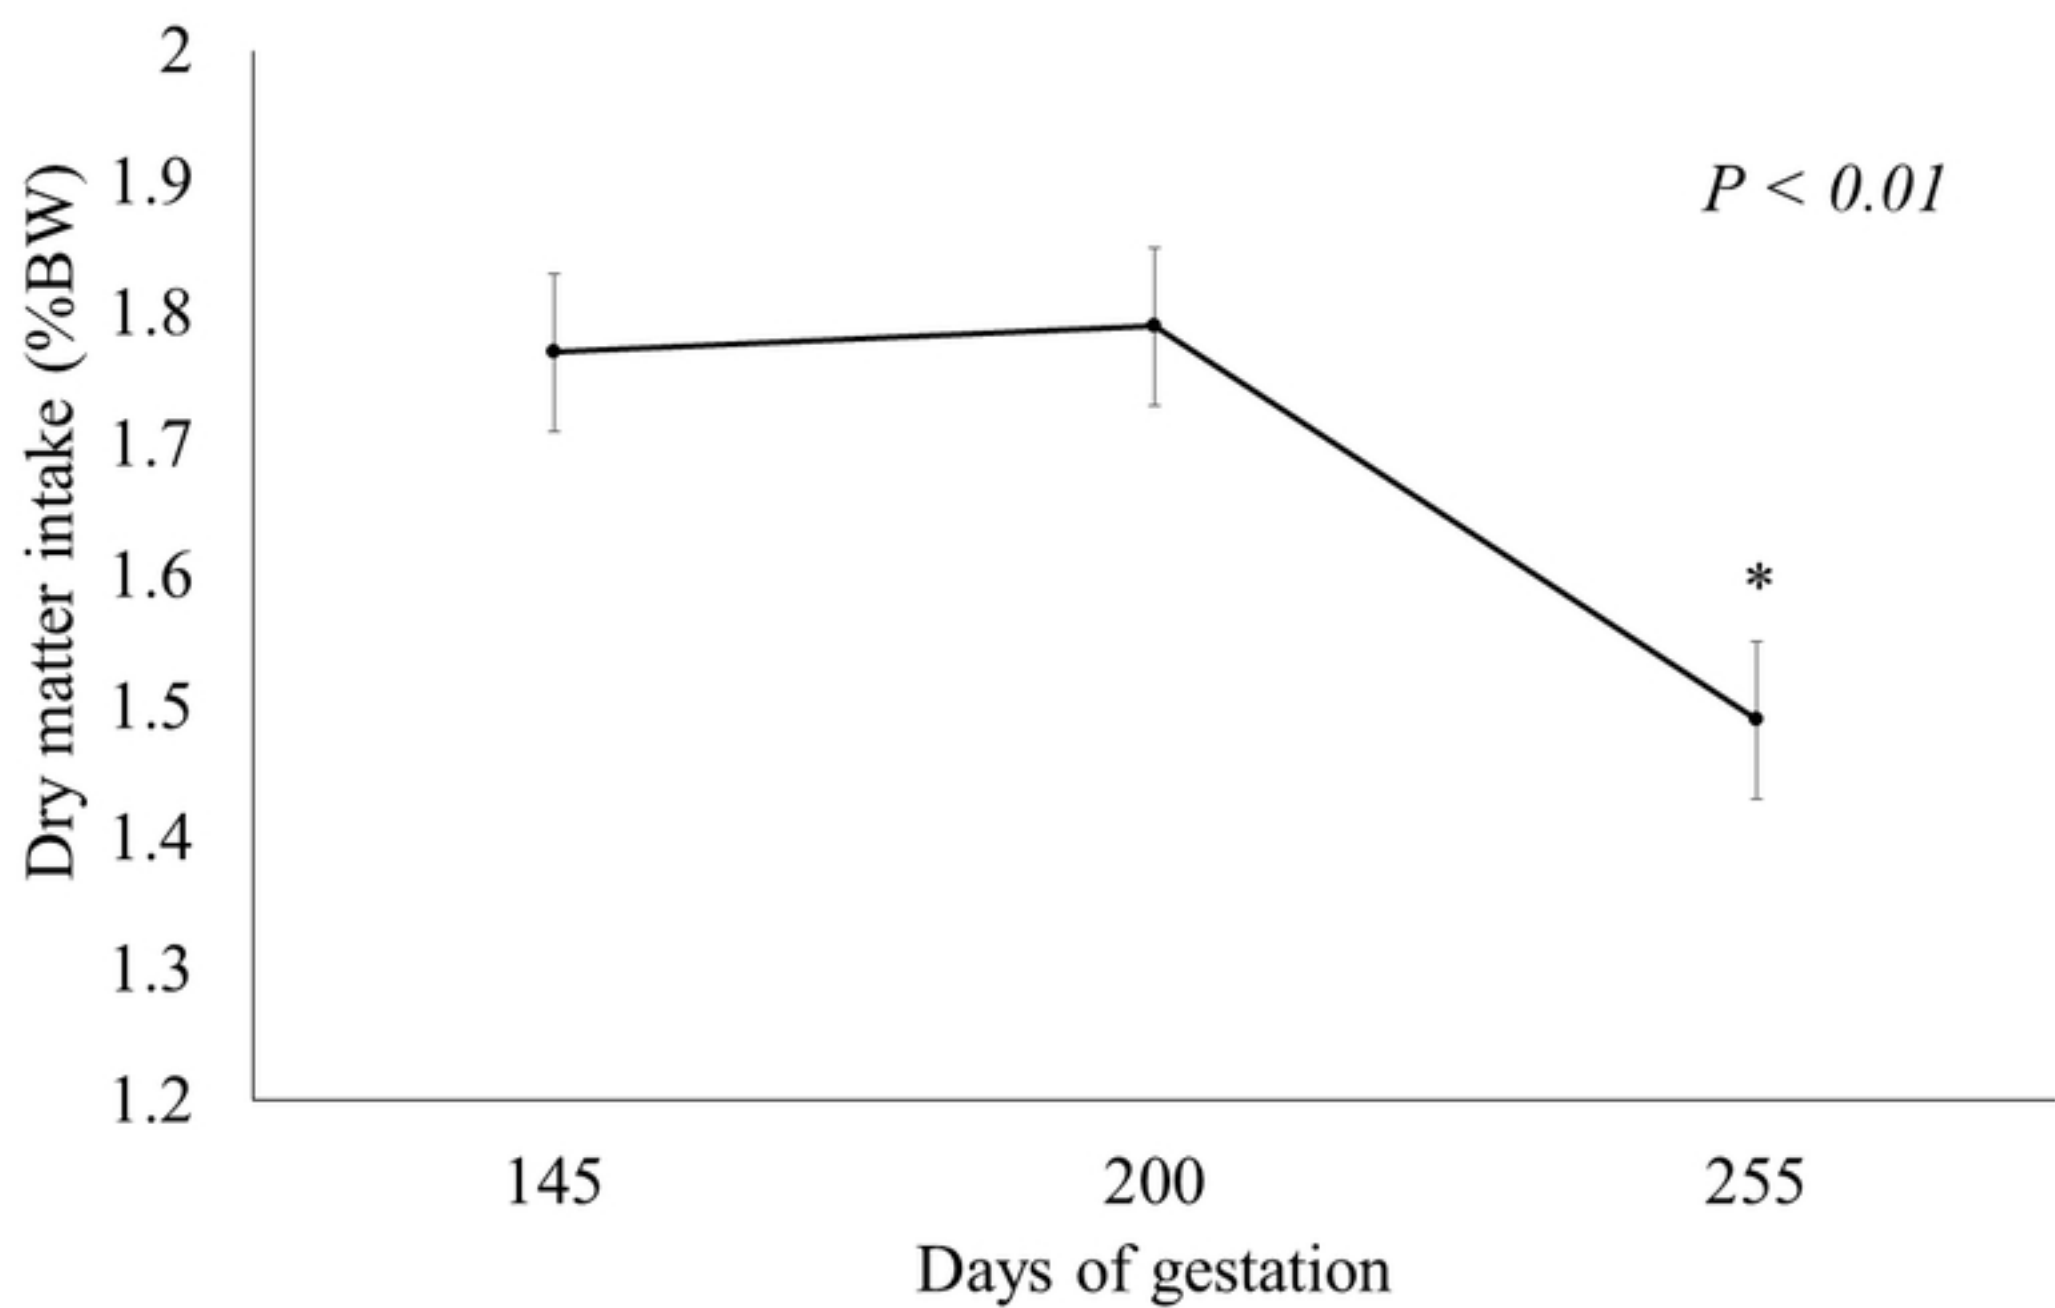

Figure 1

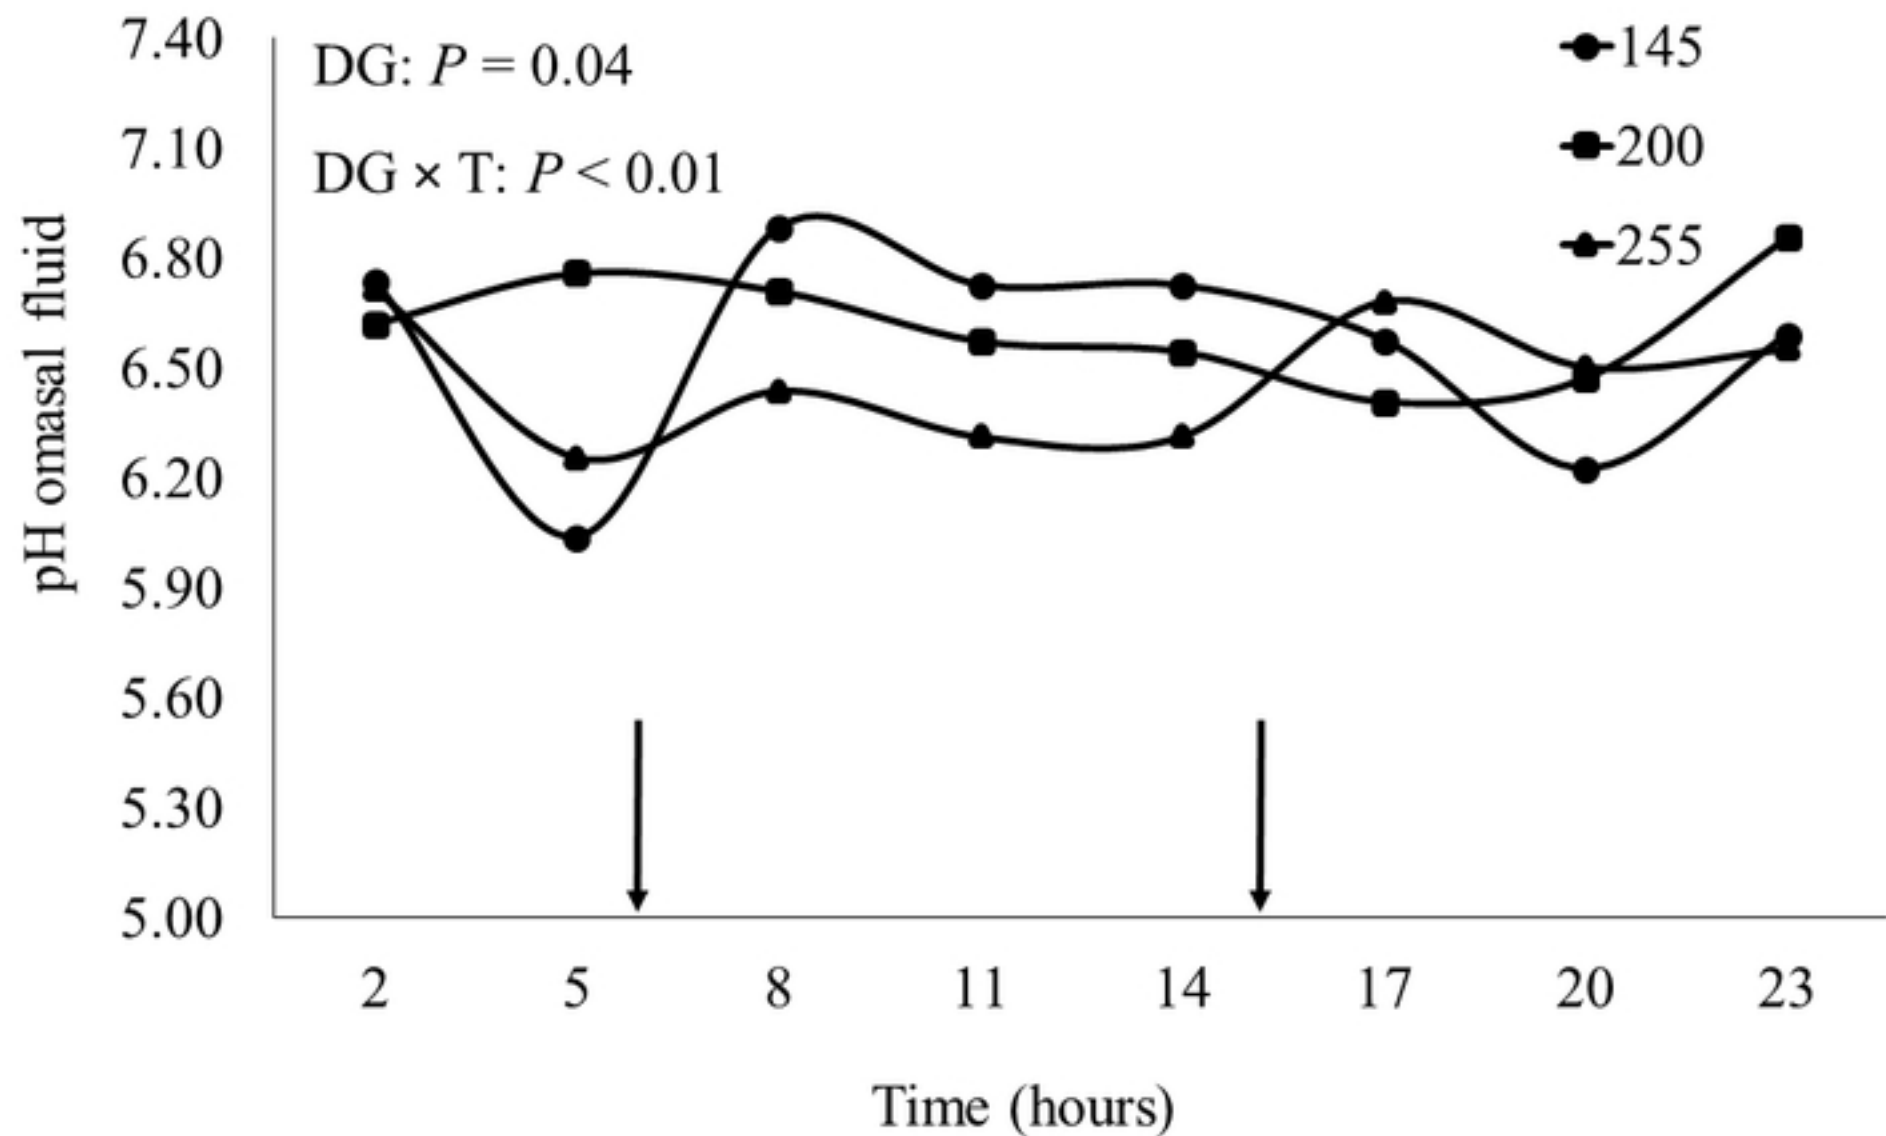

Figure 2



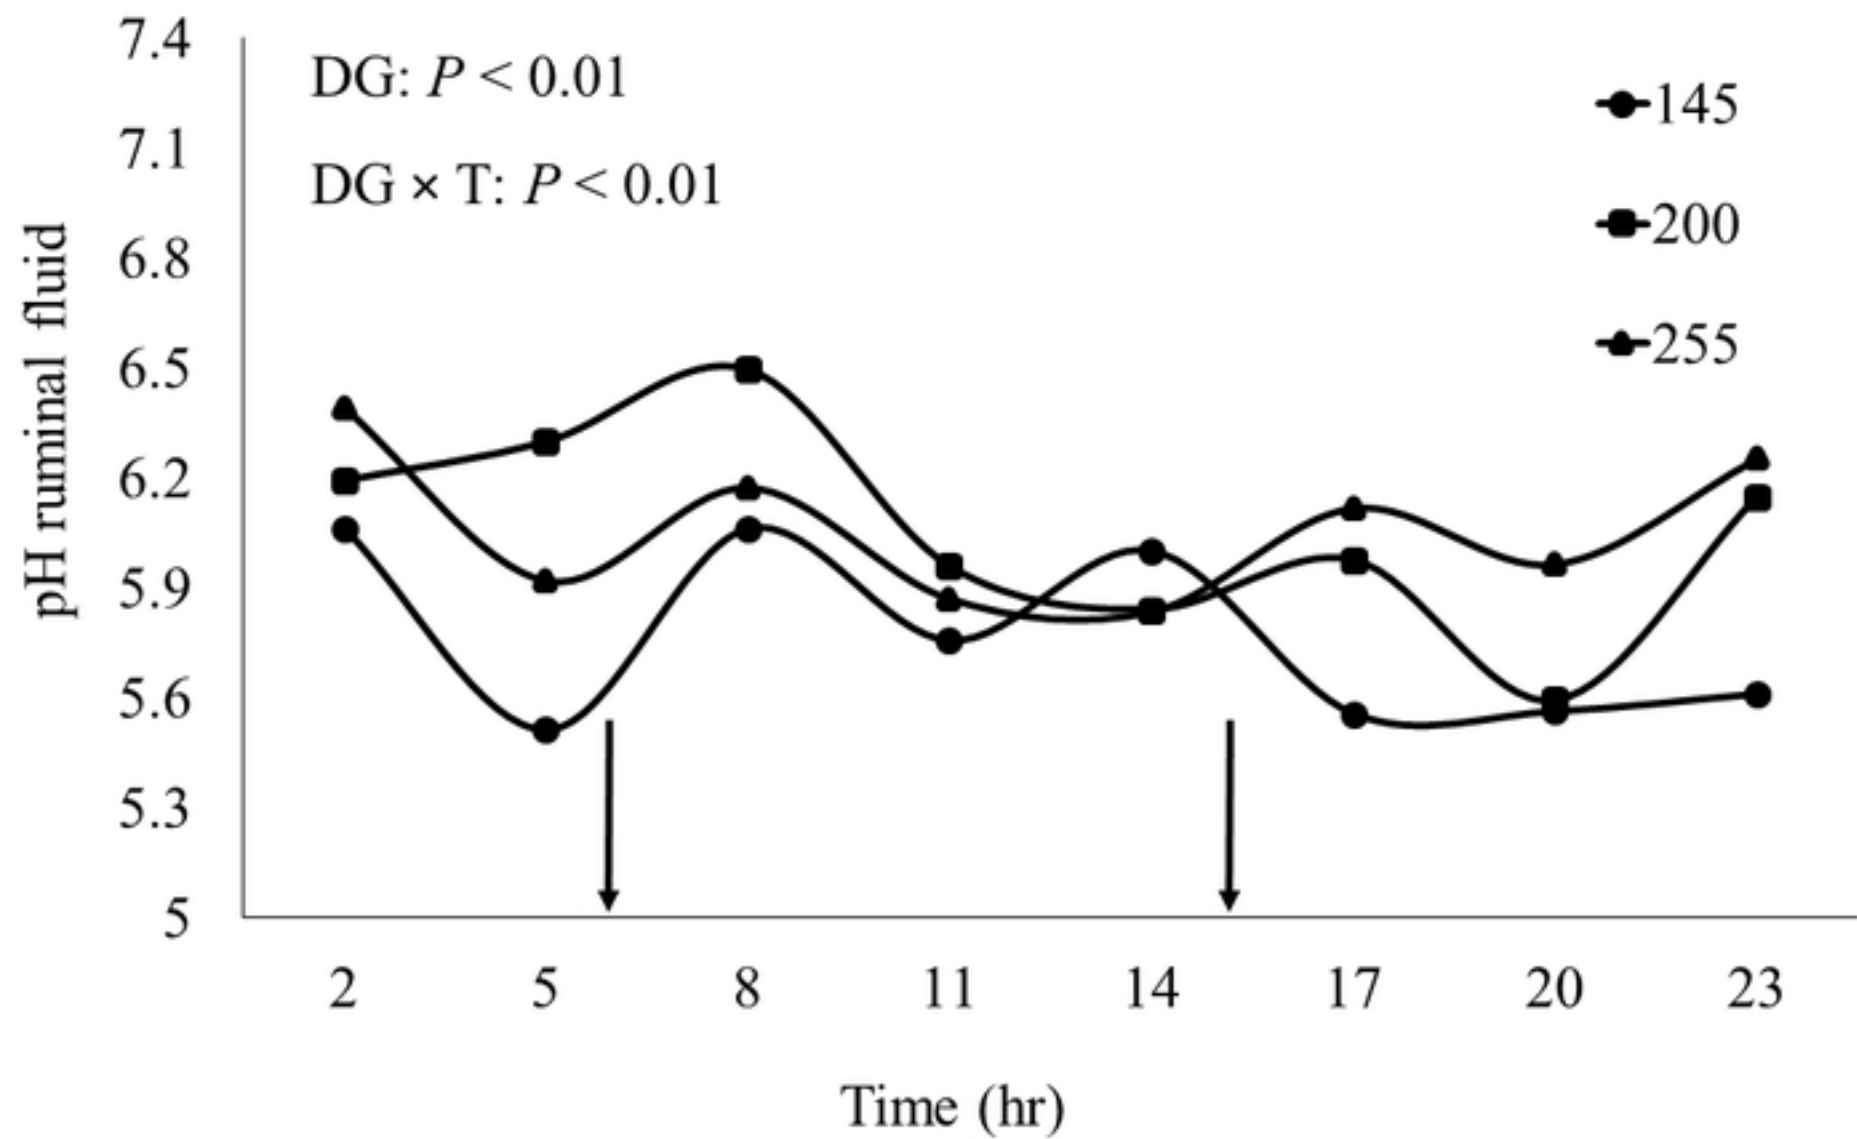

Figure 3
